# Supplementary material for: Flower-like hydrogen titanate nanosheets: preparation, characterization and their photocatalytic hydrogen production performance in the presence of Pt cocatalyst
Source: Royal Society of Chemistry journal article supplement (doi:10.1039/d0ra03698f), 2020-01-01
Supplement: d0ra03698f1.pdf [file d0ra03698f1.pdf]

Electronic Supplementary Material (ESI) for RSC Advances.

This journal is © The Royal Society of Chemistry 2020

Supporting information

**The Flower-like hydrogen titanate nanosheets: preparation,  
characterization and their photocatalytic hydrogen production  
performance in the presence of Pt cocatalyst**

Feng Dong <sup>a</sup>, Guoqing Zhang <sup>a</sup>, Yuan Guo <sup>a</sup>, Baolin Zhu <sup>b,\*</sup>, Weiping Huang <sup>a</sup> and Shoumin Zhang <sup>a,\*</sup>

<sup>a</sup>College of Chemistry, The Key Laboratory of Advanced Energy Materials Chemistry (Ministry of Education), and Tianjin Key Lab of Metaland Molecule-based Material Chemistry, Nankai University, Tianjin 300071, China

<sup>b</sup>College of Chemistry, National Demonstration Center for Experimental Chemistry Education (Nankai University), Tianjin 300071, China

\*Corresponding authors.

E-mail: zhubaolin@nankai.edu.cn, zhangsm@nankai.edu.cn

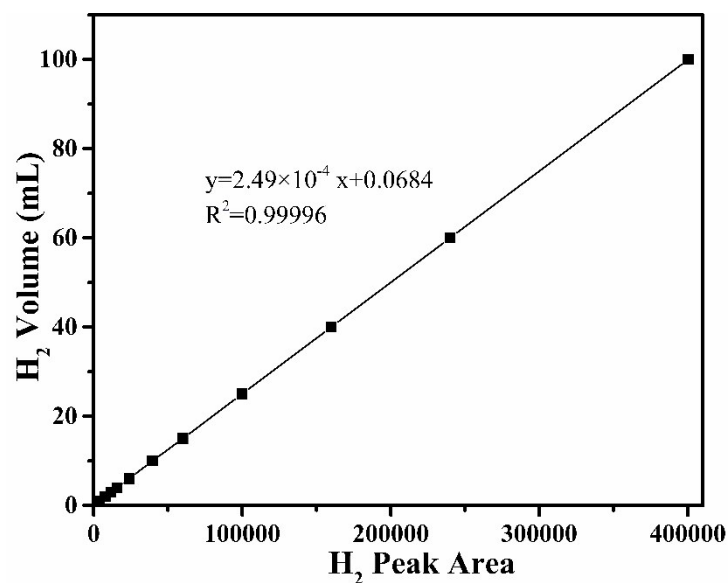

Figure S1. H<sub>2</sub> standard curve of HTO.

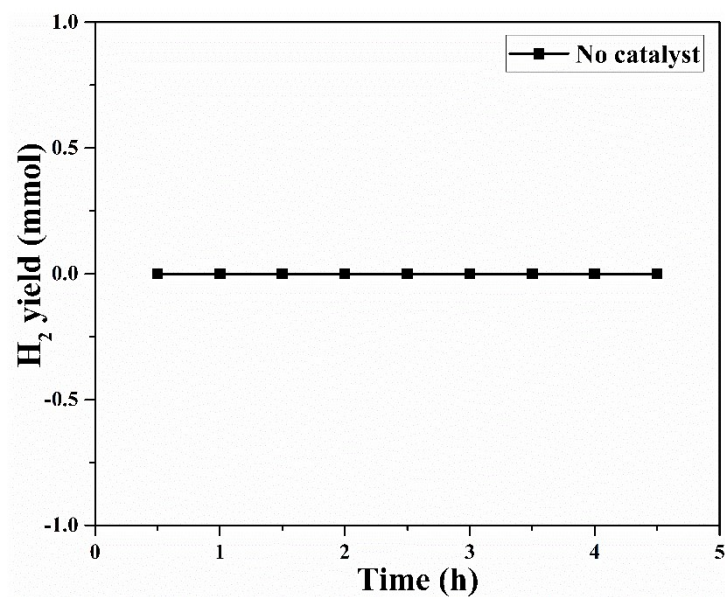

Figure S2. Control experiments for photocatalytic H<sub>2</sub> production in the absence of photocatalyst.

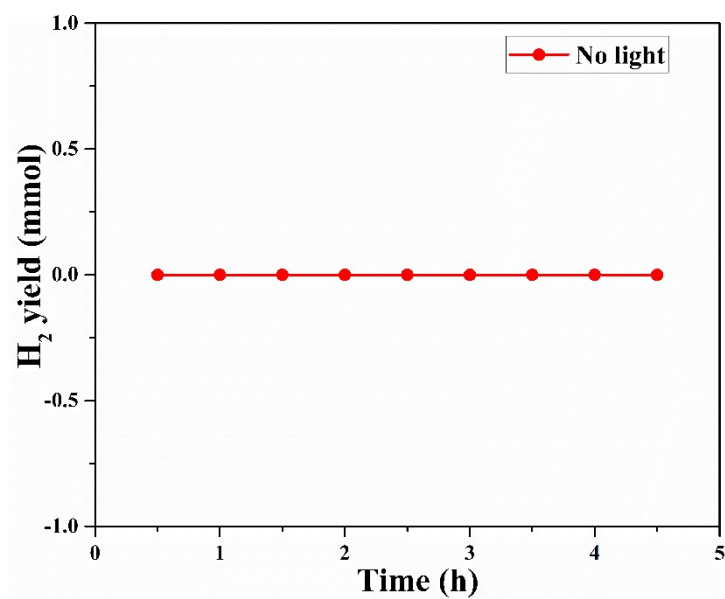

Figure S3. Control experiments for photocatalytic H<sub>2</sub> production in the absence of irradiation.

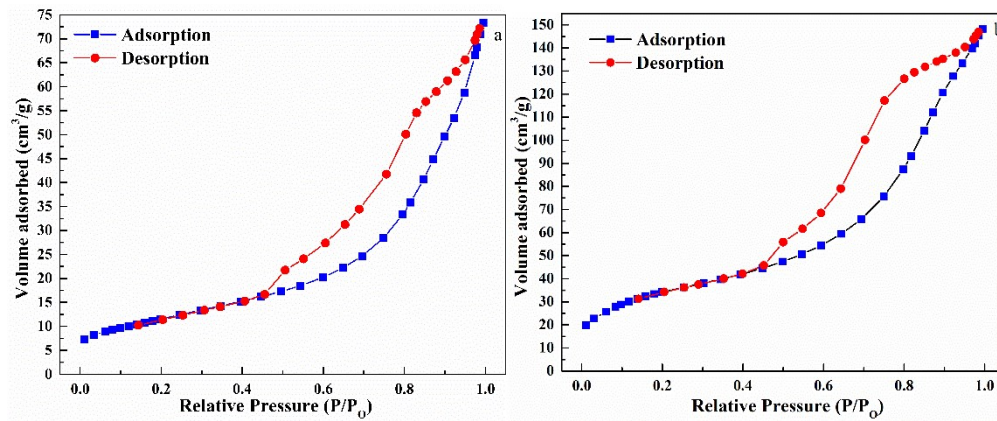

Figure S4. N<sub>2</sub> adsorption-desorption isotherms of HTO\* (a) and HTO (b).

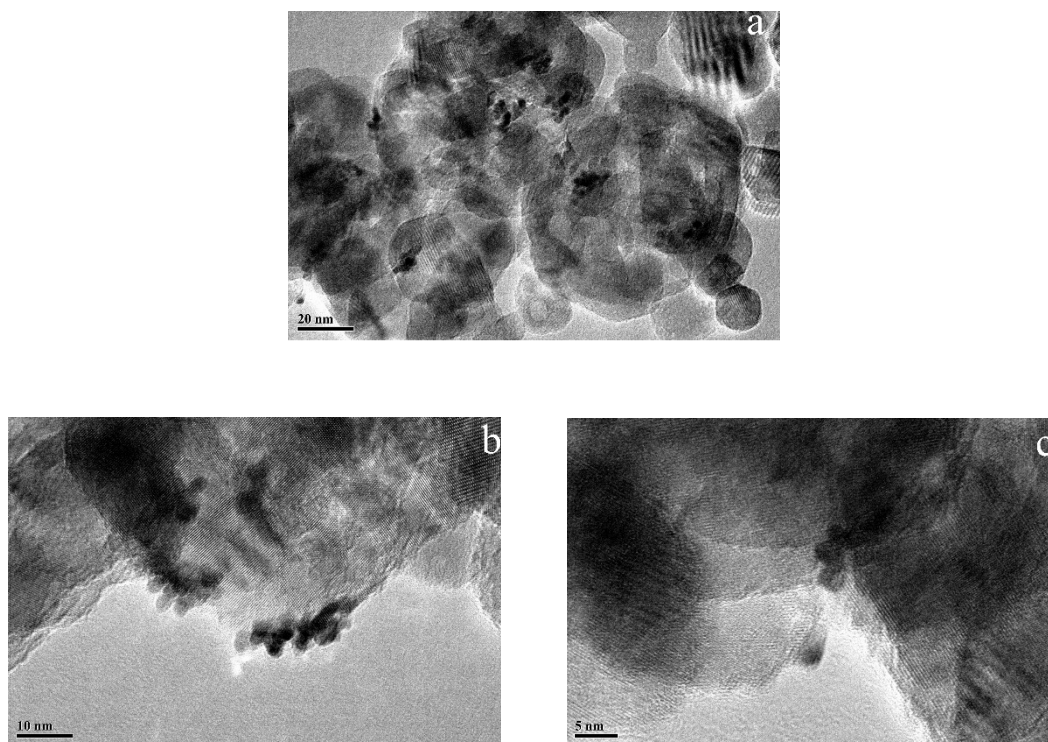

Figure S5. TEM images of commercial P25 with 0.5 wt.% Pt cocatalyst (a-c).

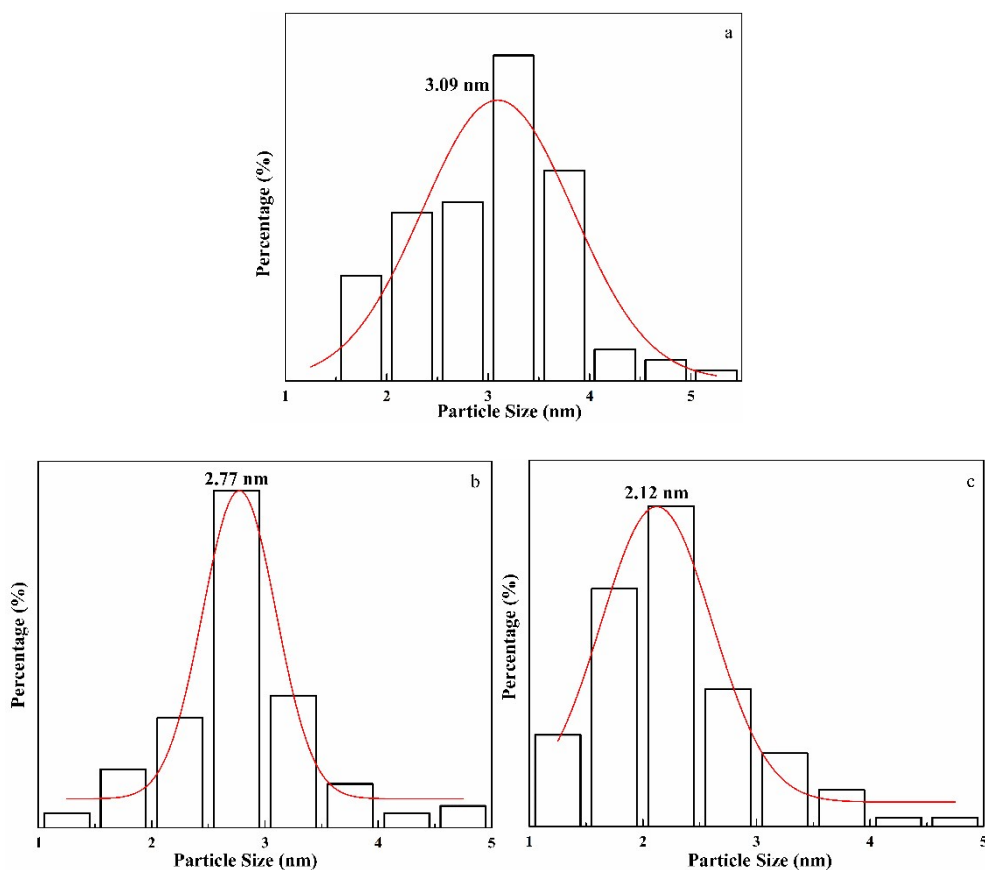

Figure S6. Pt-particle size distribution histograms of commercial P25 (a), HTO\* (b) and HTO (c).

Table S1. Comparison of the photocatalytic activity for H<sub>2</sub> evolution between HTO catalysts and other reports about TiO<sub>2</sub> catalyst.

| Catalyst            | Morphology              | Cocatalyst    | Reactant solution | H <sub>2</sub> evolution rate (mmol·g <sup>-1</sup> ·h <sup>-1</sup> ) | Ref. |
|---------------------|-------------------------|---------------|-------------------|------------------------------------------------------------------------|------|
| TiO <sub>2</sub>    | Nanoparticles           | Pt (2 wt.%)   | Water/ethanol     | 0.85                                                                   | [1]  |
| TiO <sub>2</sub>    | Nanosheets              | Pt (4 wt.%)   | Water/ethanol     | 1.54                                                                   | [1]  |
| TiO <sub>2</sub>    | Nanotubes               | Pt (5 wt.%)   | Water/ethanol     | 14.5                                                                   | [2]  |
| TiO <sub>2</sub>    | Mesoporous microspheres | Pt (1 wt.%)   | Water/methano<br> | 12.6                                                                   | [3]  |
| TiO <sub>2</sub>    | Commercial P25          | Pt (0.5 wt.%) | Water/methano<br> | 6.1                                                                    | [4]  |
| TiO <sub>2</sub>    | Nanocrystal             | Pt (1 wt.%)   | Water/methano<br> | 0.12                                                                   | [5]  |
| TiO <sub>2</sub>    | Single-crystal          | Pt (1 wt.%)   | Water/methano<br> | 0.21                                                                   | [6]  |
| TiO <sub>2</sub>    | Nanorods                | Pt (1 wt.%)   | Water/methano<br> | 1.44                                                                   | [7]  |
| Au/TiO <sub>2</sub> | Nanoparticles           | Pt (1 wt.%)   | Water/methano<br> | 3.11                                                                   | [8]  |

|     |            |               |                   |      |           |
|-----|------------|---------------|-------------------|------|-----------|
| HTO | Nanosheets | Pt (0.5 wt.%) | Water/methano<br> | 9.28 | This work |
|-----|------------|---------------|-------------------|------|-----------|

**Reference:**

- 1 J.G. Yu, L.F. Qi and M. Jaroniec, *J. Phys. Chem. C.*, 2010, **14**, 13118-13125.
- 2 T.M. David, P. Wilson and R. Mahesh, *Mater. Technol.*, 2018, **33**, 288-300.
- 3 W. Zhang, H. He and Y. Tian, *Chem. Sci.*, 2019, **10**, 1664-1670.
- 4 K. J. Chao, W.Y. Cheng and T.H. Yu, *Carbon.*, 2013, **62**, 69-75.
- 5 Y. J. Zhang, Z. F. Xu, G. Y. Li, X. J. Huang, W. C. Hao, *Angew. Chem. Int. Ed.*, 2019, **58**, 14229-14233.
- 6 Y. J. Zhang, J. M. Liu, Y. Zhang, *Nano Energy.*, 2018, **51**, 504-512
- 7 C. M. Gao, T. Wei, Y. Y. Zhang, X. H. Song, *Adv. Mater.*, 2019, **31**, 1806596.
- 8 M. Zhao, H. Xu, H. Tong, *ACS. Catal.*, 2018, **8**, 4266-4277.
